# Supplementary material for: Is regular drinking in later life an indicator of good health? Evidence from the English Longitudinal Study of Ageing
Source: HighWire-hosted journal article supplement (doi:10.1136/jech-2015-206949), 2016-01-21
Supplement: jech-2015-206949supp.pdf [file jech-2015-206949supp.pdf]

Appendix 1: Distribution of Variables (n=4741)

| Variable                          | Number of participants in all 3 waves (%) | Variable                   | Number of participants in all 3 waves (%) |
|-----------------------------------|-------------------------------------------|----------------------------|-------------------------------------------|
| <b>Health</b>                     |                                           | <b>Wealth</b>              |                                           |
| Good health all waves             | 2753 (58.1%)                              | Bottom Quintile            | 620 (13.1%)                               |
| Poor health all waves             | 748 (15.8%)                               | 2 <sup>nd</sup> Quintile   | 860 (18.1%)                               |
| Health deteriorates between waves | 596 (12.6%)                               | 3 <sup>rd</sup> Quintile   | 955 (20.1%)                               |
| Health improves between waves     | 497 (10.5%)                               | 4 <sup>th</sup> Quintile   | 1059 (22.3%)                              |
| Other/missing                     | 147 (3.1%)                                | Top Quintile               | 1168 (24.6%)                              |
| <b>Depression</b>                 |                                           | Missing                    | 79 (1.7%)                                 |
| No depression all waves           | 3328 (70.1%)                              | <b>Education</b>           |                                           |
| Becomes depressed between waves   | 279 (5.9%)                                | No education               | 1744 (36.8%)                              |
| Depression in all waves           | 473 (10.0%)                               | Compulsory education       | 1466 (30.9%)                              |
| Depression improves between waves | 386 (8.1%)                                | Post compulsory education  | 925 (19.5%)                               |
| Other/missing                     | 275 (5.8%)                                | Degree or higher           | 638 (13.5%)                               |
| <b>Gender</b>                     |                                           | Missing/not known          | 1 (0.0%)                                  |
| Male                              | 2048 (43.2%)                              | <b>Smoking</b>             |                                           |
| Female                            | 2693 (56.8%)                              | Non smoker                 | 1856 (39.2%)                              |
| <b>Marital Status Wave 0</b>      |                                           | Used to smoke occasionally | 300 (6.3%)                                |
| Married                           | 3303 (69.7%)                              | Used to smoke regularly    | 1802 (38.0%)                              |
| Single                            | 236 (5.0%)                                | Current smoker             | 781 (16.5%)                               |
| Separated/divorced                | 544 (11.5%)                               | Missing                    | 2 (0.0%)                                  |
| Widowed                           | 655 (13.8%)                               | <b>BMI</b>                 |                                           |
| Other/missing                     | 3 (0.0%)                                  | 25-30                      | 85 (1.8%)                                 |
| <b>Employment Wave 0</b>          |                                           | <20                        | 1172 (24.7%)                              |
| Employed                          | 2063 (43.5%)                              | 20-25                      | 2054 (43.3%)                              |
| Economically inactive             | 770 (16.2%)                               | >30                        | 1087 (22.9%)                              |
| Retired                           | 1904 (40.2%)                              | Missing                    | 343 (7.2%)                                |
| Other/missing                     | 4 (0.1%)                                  |                            |                                           |
